# Supplementary material
Source: PubMed Central journal article supplement (PMC3479344)
Supplement: NIHMS405527-supplement-01.pdf [file NIHMS405527-supplement-01.pdf]

Type of file: figure

Label: Suppl Fig 1

Filename: IJC\_27598\_sm\_SupplFig1.TIF

A

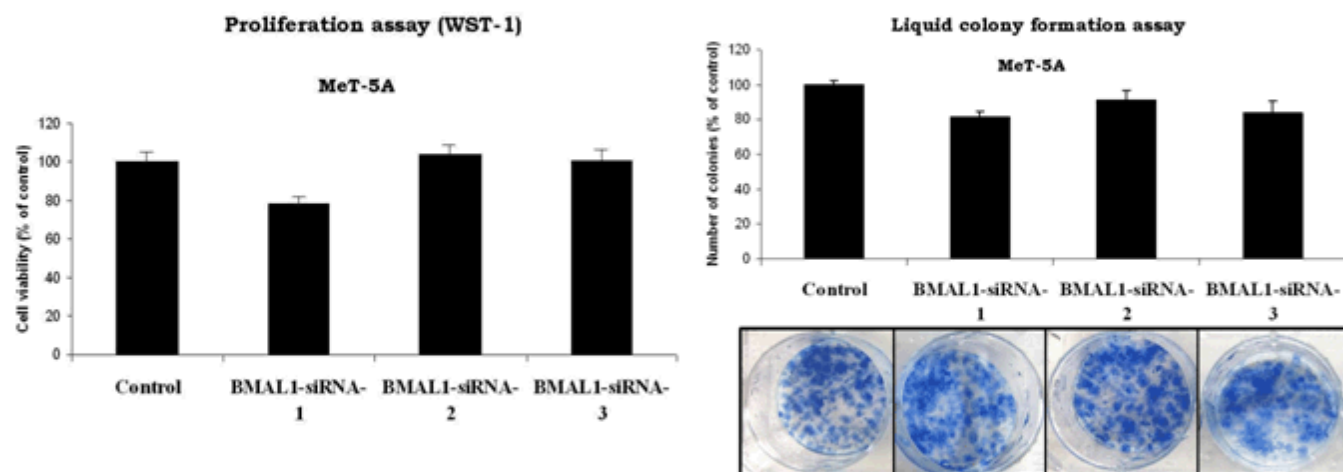

B

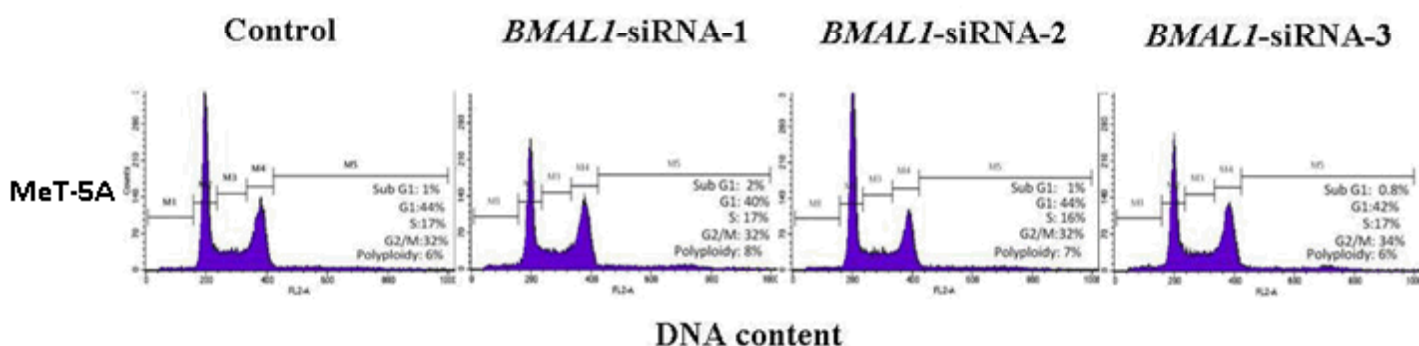

**Supplementary Figure 1 Limited effect of *BMALI* knockdown upon growth, colony formation and cell cycle profile of MeT-5A.** (A) WST-1 proliferation and liquid colony formation assays of MeT-5A after *BMALI* knockdown. (B) Cell cycle analysis of MeT-5A cells transfected with *BMALI*-siRNA or control oligos. 48 h post-transfection, cells underwent serum starvation for 12 h and then were harvested and prepared for cell cycle profiling by flow cytometry, as described in Material and methods. Results are the average of two independent experiments

Type of file: figure

Label: Suppl Fig 2

Filename: IJC\_27598\_sm\_SupplFig2.TIF

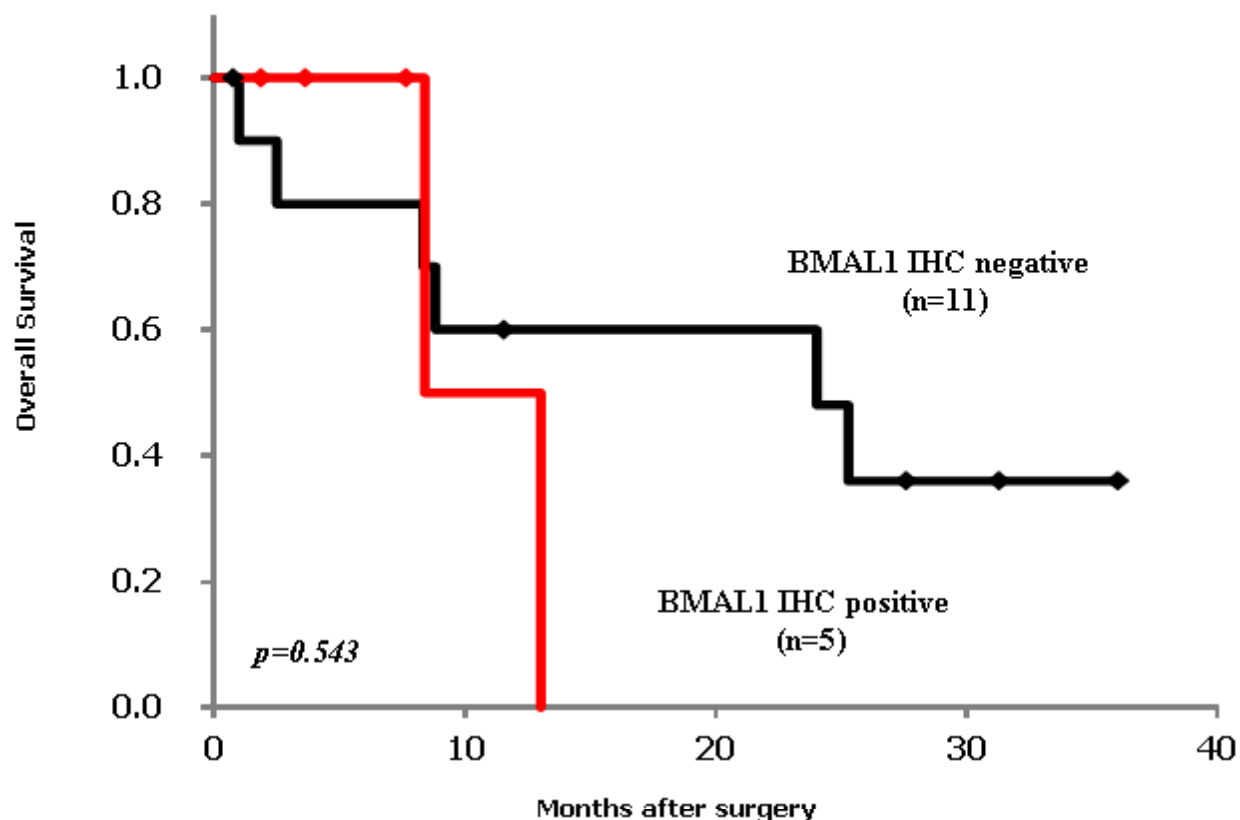

**Supplementary Figure 2 Assessment of BMAL1 expression in relation to the clinicopathological parameters.** Kaplan-Meier plots were used to estimate overall survival curves, and survival differences were analyzed by the log-rank test.
